# Supplementary material for: Systematic Review of Cemented and Uncemented Hemiarthroplasty Outcomes for Femoral Neck Fractures
Source: Springer Nature journal article supplement (doi:10.1007/s11999-008-0368-3), 2008-07-23
Supplement: MOESM1 [file 11999_2008_368_MOESM1_ESM.xls]

## Sheet: Extracted Data
			Hips	Age	Operative Time	EBL	Overall Mortality/Followup	Complication/Followup	Revisions/Followup	Hospital days	Subsidence	Radiolucency	Pain	Using Assistive Device
Eiskjaer et al 1989
	Christiansen	Cemented	477				51/1 yr
	Austin Moore	Uncemented	202				54/1 yr
Holt et al 1994
	Monk	Cemented	291				42/in hospital
	Monk	Uncemented	54				5/in hospital
Lennox & McLauchlan 1993
	Hastings	Cemented	136	80			30/3 mo	6/19 mo	2/19 mo	25			6	27
	Monk	Uncemented	71	82			13/3 mo	5/19 mo	5/19 mo	27			8	21
Gebhard et al 1992
	Not specified	Cemented	77					6/1 yr						16
	Not specified	Uncemented	45					6/1 yr						13
Lausten et al 1987
	Monk	Cemented	45	78.1	78	370	10/6 mo	20/postop			0	5	11
	Monk	Uncemented	61	79.9	65	310	17/6 mo	34/postop			1	12	14
Lo et al 1994
	Bateman	Cemented	190	75.3	109	510	33/34 mo	14/postop	1/34 mo	11.3	4	20	5
	Bateman	Uncemented	261	72.5	88	350	58/58 mo	16/postop	15/58 mo	10.7	19	67	9
Sonne-Holm et al 1982
	Austin Moore	Cemented	55								0	4	23
	Austin Moore	Uncemented	57								14	2	13
Dorr et al 1986
	Not specified	Cemented	37	72				13/unavailable	4/unavailable		0			6
	Not specified	Uncemented	13	66				4/unavailable	1/unavailable		2			9
Emery et al 1991
	Thompson	Cemented	27	78	70	325	8/17 mo	8/17 mo		21.8			6	8
	Austin Moore	Uncemented	26	79.6	62	276	6/18 mo	5/18 mo		19.5			16	16
Khan et al 2002
	Austin Moore	Cemented	123	84	89.1		63/3 yr
	Austin Moore	Uncemented	121	82	73.4		69/3 yr
Foster et al 2005
	Thompson	Cemented	174	80			2/1 mo
	Austin Moore	Uncemented	70	83			6/1 mo
